# Supplementary material
Source: publisher figshare collection journal article supplement (https://karger.figshare.com/ndownloader/files/18199517)
Supplement: Supplementary file 1 [file 18199517]

## Alterations in bone homeostasis and microstructure related to depression and allostatic load

Pia-Maria Wippert, Andrea Block, Isabelle M. Mansuy, Eva M. J. Peters, Matthias Rose, Michael A. Rapp, Alexander Huppertz, & Karin Wuertz-Kozak

### Introduction

From early childhood to late adulthood, bones are continuously remodeling and adapting to environmental changes. Various conditions can disturb this remodeling process such as medical interventions, aging and metabolic bone diseases [1]. Remodeling processes require both bone resorption and formation, which are driven by osteoclasts and osteoblasts, respectively. Both cell types are affected by physiological (*e.g.* age, gender, physical activity and mobility states, hormones) and pathological conditions (*e.g.* prematurity, growth hormone deficiency, malnutrition, malabsorption, metastatic bone disease) [1], which can negatively impact a bone's capacity to adapt to present needs.

Bone remodeling can be measured through markers of bone formation (*e.g.* osteocalcin [OC], procollagen type 1 N-terminal propeptide [P1NP]) or bone resorption (*e.g.* beta-CrossLaps [beta-CTX]), both used as clinical markers of bone health. OC is an extracellular, non-collagenous protein secreted by osteoblasts during bone formation that has several hormone-like features such as an influence on energy homeostasis [2]. P1NP is a direct quantitative measure of osteoblast activity synthesizing collagen type 1, a component predominantly located in the bone matrix. It is also used in diagnosis and management of osteoporosis [2]. In contrary to OC and P1NP, beta-CTX is released during bone resorption and is a specific marker for degradation fragments of mature type I collagen from bone, which is the main component (approximately 90%) of the protein matrix of bone. Bone turnover markers provide information about rates of bone loss and gain, and therefore reflect the metabolic activity of bones that is complementary to bone health measurements like bone mineral density (BMD) [3].

Recent work has provided compelling evidence that these bone markers can be affected by psychosocial stress [4]. Traumatic events and chronic stress are suspected to provoke strong and long-lasting effects on bone remodeling, mediated by activation of endocrine stress signaling pathways. To identify a possible link between pathogenic social stressors, stressful psychological states and health outcomes, different models can be applied [5-7].

The allostatic load model is one of the primary neurobiological stress models that proposes that homeostasis in the body is maintained by adaptive processes regulated by biological mediators (*e.g.* metabolites, hormones and cytokines) for stabilizing the internal milieu during and after stressful challenges from the environment [8, 9]. Allostasis is defined as a state of adaptive responsiveness to adversity, whereby the autonomic nervous system (ANS), the hypothalamic-pituitary-axis (HPA), the hypothalamic-pituitary-thyroid axis (HPT, metabolic system) and the immune system are involved in promoting physiological stability. However, repeated overstimulation of the allostatic mediators may result in chronic over-activation of the stress response systems, inducing a domino effect in the involved biological systems that ultimately leads to allostatic overload, toxic stress, pathology and finally epigenetic adaptations [10-12][13].

Multiple independent publications provide evidence that some specific allostatic mediators, such as cortisol, GH, or IGF-I, play a major role in bone remodeling processes [14-18]. Published data suggests a connection between bone homeostasis and glucocorticoids, whereby elevated cortisol levels may inhibit osteoblast proliferation, differentiation and apoptosis, leading to decreased bone mineral density. A reduction in bone mass may also be induced by glucocorticoids that furthermore inhibit-GH and gonadal steroid production [19-21]. Moreover, glucocorticoids function as an important link between the endocrine stress response system and the immune system. Glucocorticoid receptors (GR) in particular account for the suppression of NF- $\kappa$ B and AP-1 [22], the transportation and functioning of leukocytes and the inhibition of pro-inflammatory cytokine production (*e.g.* TNF- $\alpha$ , IL-1, IL-6). Furthermore, GR resistance may be involved in the development of osteoporosis [23]. In addition, the stress-related corticotrophin-releasing hormone (CRH) induces the release of IL-6 [24-26] and other cytokines (*e.g.* IL-1 $\beta$ , TNF- $\alpha$ ) that influence the differentiation of mesenchymal stem cells, suppress osteoblast function and initiate osteoclastogenesis and function [27, 28]. Lastly, while GH modulates osteoblast proliferation and differentiation [19-21], IGF-1 decreases bone mineral density (BMD) [29, 30]. Considering the impact of these singular allostatic mediators on bone health, a link between bone health and stress seems reasonable.

Regarding depressive disorders, several studies have shown that higher allostatic loads [31-33] furthermore play a major role in the pathogenesis of depressive disorders, linking depression to comorbid disease states such as osteoporosis [32, 34-37]. While an enhanced physiological state is *e.g.* tolerable while the coping with a stressful life event, the stressor and subjective burden should be terminated to avoid neuroendocrinological and neuroanatomic alterations that could result in allostatic overload and toxic stress. The ability to regain homeostasis after stressful events is dependent on the personal and social (exposome) resources [38], as well as epigenetic adaptations [13]. There is substantial evidence that mental diseases, such as depression, could be interpreted as disorders of the stress response that interacts with states of allostatic load. The influence of depressive disorders on the homeostasis of tissues such as bones [39-43] will certainly depend on whether is the person is experiencing a chronic depressive state or undergoing an acute depressive episode that may be triggered by a critical event.

Although some studies have reported decreased BMD in depressed people [44, 45], most data were obtained from epidemiological studies or studies focusing on other populations and thus lack a clear operationalization of stressor forms (*e.g.* chronic vs. traumatic), detailed biomarker sets, confounder controlling (medication, smoking and alcohol use) or longitudinal design. Thus far, no distinction has been made between chronically and episodically depressed patients and their potential alteration of bone homeostasis. Furthermore, a systematic evaluation of pathways and specifically interacting mechanisms linking psychosocial stress to important bone homeostasis and osteoporosis markers (OC, P1NP, CTX, BMD) is still missing. Hence, it is unclear whether a depressive episode leads to an adaptation of the bone metabolism and, if that is the case, to what extent an interaction with traumas, life events and allostatic load gained over life span is present. Furthermore, to the best of our knowledge, there is no study in this context that applied highly sensitive mathematic models that allow to simultaneously respect the interaction of allostatic mediators and the order of their importance, while avoiding the problem of overfitting of singular testing. This indeed would be necessary to estimate the significance of singular mediators, to derive a diagnostic

tool, and subsequently to develop individual treatment strategies for bone diseases (e.g. osteoporosis, arthrosis, fractures) and their effect on unspecific pain syndromes.

Therefore, in the first part of this study, we aimed to evaluate cross-sectionally: a) whether people with different levels of depressive symptomatology and psychosomatic symptom severity show an altered bone metabolism and b) whether life burden in these people is associated with the pathogenesis of depression and an altered bone metabolism and lastly c) whether allostatic load is associated with depression or life burden (comorbidity check)

After gaining knowledge about alterations of the bone metabolism within an acute depression phase, we investigate in the second study part cross-sectionally and longitudinally: 1) whether a high versus low allostatic load in depressive patients is linked to disrupted bone metabolism and microstructure and 2) whether a mathematical algorithm can select singular allostatic load mediators that could be used to identify patients at higher risk of disrupted bone metabolism, for optimized medical care.

## **Materials and Methods**

### **Study procedure**

Study objectives presented here, were investigated at three measurement points ( $t_0$ ,  $t_2$ ,  $t_4$ ) of an observational multicenter study (DEPREHA) which extended over four measurement points (baseline ( $t_0$ ), after 5 weeks ( $t_1$ ), 5 months ( $t_2$ ) and 8 months ( $t_3$ ) after baseline). A subsample of 54 participants took part in a further follow-up measurement at about 18 months ( $M= 15.4$ ,  $SD = 4.5$ ) after DEPREHA completion ( $t_4$ ). At each measurement point, trained study nurses administered a comprehensive questionnaire and collected psychological data. Blood samples were drawn (morning hours, 7-9 am) from the arm and collected in plain blood collection tubes or tubes containing EDTA, citrate or sodium fluoride for subsequent analysis by laboratory partners. Participants were instructed to stay abstinent and to only drink water during the last 12 hours prior to assessment. Participants were also instructed to avoid high amounts of coffee, tea and food (e.g. bananas, cheese, almonds, nuts, vanilla, citrus fruits) on the respective previous day. Furthermore, they should refrain from intense exercise and unscheduled medication.

### **Participants**

$n=240$  participants were consecutively recruited during clinic check-ins at three study sites: a psychosomatic rehabilitation clinic (multimodal antidepressant therapy), an outpatient psychiatric practice (unimodal antidepressant therapy), and a psychotherapeutic outpatient clinic (antidepressant treatment as usual: pharmacology and psychotherapy). Power calculation for the main project (evaluation of therapy context efficacy in dependence of personal risk profiles) suggested  $1-\beta = 0.94$  for a case number of  $n = 60$  per therapy group [46]. Inclusion criteria were: 18 to 65 years of age, more than 21 days absent from work within the last 12 months and a depressive episode (mainly ICD-10 F32.x or F33.x). Exclusion criteria were: pregnancy, hormone therapy (with the exception of contraceptive and thyroid hormone therapy), inability to fill in a questionnaire, intellectual disabilities (ICD-10 F70-79) or the presence of one of the following diseases: acute infection, endocrine and metabolic disorders (e.g. diabetes mellitus type II, renal or liver diseases), neurological diseases, dementia (ICD-10 F00-F03), schizophrenia (ICD-10 F20), emotional-unstable

personality disorders (ICD-10 F60.3x), disease of the immune system, substance abuse and dependency (with the exception of nicotine). All participants were fully informed in verbal and written form about the intent and content of the study. All participants gave their written informed consent.  $n = 139$  participants completed all measurements.

## Instruments

### Psychometric measures

Besides standardized questionnaires, information regarding demographic characteristics, physical ailments, alcohol and tobacco consumption, as well as medication intake were assessed.

Depressive symptoms and severity were assessed using the Beck Depression Inventory-II (BDI-II; [47, 48]), a 21-item self-report questionnaire that addresses current affective, cognitive, motivational and physiological symptoms of depression. Internal consistency was proven to be good with Cronbach's Alpha 0.89 [49].

Psychosomatic symptoms were assessed using the Symptom Check List-90-revised (SCL-90-R, [50, 51]) that measures the subjective impairment caused by physical, but above all psychological symptoms in the last 7 days. The SCL-90-R consists of 90 items that are to be answered on a 5-point Likert scale from 0 (not at all) to 4 (extremely), which can be assigned to a total of nine dimension of psychopathological factors (F): somatization (F1), obsessive-compulsive (F2), interpersonal sensitivity (F3), depression (F4), anxiety (F5), hostility (F6), phobic anxiety (F7), paranoid ideation (F8) and psychoticism (F9). Three supplementary global indices give information about the severity of symptoms: Global Severity Index (GSI; basic psychological distress/burden of all symptoms), the Positive Symptom total Index (PST; count of all experienced symptoms) and the Positive Symptom Distress Index, PSDI (mean intensity of distress for the reported symptoms). Cronbach's Alpha for SCL-90-R GSI scale in the sample was 0.96 and for all subscales (F1-F9) in a range from 0.66 (psychoticism) to 0.88 (depression).

"Life burden" was operationalized by life events that were assessed by a modified version of the "Inventory for recording life-changing events" [52]. Participants rated 34 critical life-events regarding occurrence, frequency and year of occurrence. The accumulation of critical, life-changing events was counted for every participant over the whole life span ( $LE_{all}$ ) and critical time periods prior to diseases (1 year, 5 years, 10 years). Furthermore, all participants identified their three most distressful life-events and answered additional questions concerning their strain. The scores ranged between 0 (no strain) and 4 (high strain). In the presented paper only the accumulation of life-changing events scale ( $LE_{all}$  for "life burden") was used for analysis. Cronbach's Alpha in the sample was alpha 0.83.

### Physiological measures

In the main project, 21 allostatic load mediators were assessed based on the concept of allostatic load and its influence on psychosomatic disorders [12, 53]. In detail:

*Glucose metabolic biomarkers:* Glycosylated hemoglobin (HbA1c) was determined with HPLC Bio-Rad Variant II (Bio-Rad Laboratories, CA, USA). Plasma glucose was measured via a hexokinase enzymatic reaction using the Roche Cobas 8000 (Roche Diagnostics Ltd., Basel, Switzerland). Fasting insulin was assessed by the electrochemiluminescence enzyme immunoassay method (ECLIA), using Roche

Cobas 8000 Modul E620 (Roche Diagnostics Ltd., Basel, Switzerland). To estimate insulin resistance, the homeostatic model assessment (HOMA) index was calculated by the formula: glucose [mg/dl] × insulin [μU/ml]/405 [54]. Body mass index was available from medical records.

*Lipid metabolic biomarkers:* Triglycerides, HDL cholesterol, LDL cholesterol and total cholesterol were measured using Roche/ Hitachi Cobas 701/ 702 (F. Hoffmann-La Roche, Ltd. Basel, Switzerland) via enzymatic colorimetric assays.

*Sympathetic nervous system biomarkers:* Epinephrine, norepinephrine and dopamine were measured in plasma and analysis was performed with enzyme-linked immunosorbent assays (RE59251 for epinephrine and dopamine and RE59261 for norepinephrine; both from IBL International GmbH, Hamburg, Germany).

*Hypothalamus-Pituitary-Adrenal Axis (HPA):* Serum-cortisol and serum-DHEA were analyzed by immunological in-vitro-test electrochemiluminescence immune assay (ECLIA) (REF 06687733 190 for serum cortisol, REF 03000087 for serum DHEA; both Roche COBAS, MODULAR ANALYTICS E17, F. Hoffmann-La Roche, Ltd. Investor Relations Basel, Switzerland). Serum-aldosterone was measured with competitive ELISA (RE52301 from IBL, International GmbH, Hamburg, Germany).

*Immune System:* Soluble E-selectin, soluble ICAM-1 and TNF-α were assessed with enzyme-linked immunosorbent assays (BE59011 for sICAM-1, BE59061 for sE-selectin and BE58351 for TNF- α; all from IBL International GmbH, Hamburg, Germany). Interleukin-6 was measured with immunological in-vitro-test electrochemiluminescence immune assay (ECLIA) (REF 05109442 190 from Roche COBAS MODULAR ANALYTICS E170, Ltd. Basel, Switzerland). CRP was measured with particle-enhanced turbidimetric immunoassay (Roche cobas c 701/702 F. Hoffmann-La Roche, Ltd. Investor Relations CH-4070 Basel, Switzerland) and fibrinogen with the coagulometric method (with added heparin inhibitor, see STA Evolution from Stago).

*Cardiovascular markers:* Systolic and diastolic blood pressure [mmHg] and heart rate [beat per minute] were available from medical records.

*Bone Markers:* Measurements of osteocalcin (OC), procollagen type 1 amino-terminal propeptide (P1NP) and cross-linked telopeptides (CTX) were conducted on serum samples with electrochemiluminescence immunoassays “ECLIA” from Roche COBAS Elecsys 2010 MODULAR ANALYTICS E170 (REF 12149133 122 for Osteocalcin, REF 03141071 190 for P1NP and REF 11972308 122 for CTX, F. Hoffmann-La Roche, Ltd., Basel, Switzerland). Bone mineral density (BMD) was measured by DXA bone densitometry measurement (Lunar, Prodigy Advance, GE Healthcare, Illinois, USA) in the lumbar spine (lumbar vertebral bodies L1-L4) and both hips.

#### Statistical Analysis

Questionnaire data were prepared along psychometric manual rules. Biomarkers were first controlled for outliers using current literature and analysis kit recommendations, and then summarized into the multi-system allostatic load score, representing allostatic mediators of five physiological systems (SNS, HPA, glucose metabolism, lipid metabolism and inflammatory immune activity). ALI scores were calculated as the sum of single biomarkers falling within the high-risk quartile of the sample. System risk values were scored from 0 to 1 indicating 0-100% of a

participant's system biomarkers fell within the high-risk range [55]. Because of a small complete case set for ALI 21 and no differences between ALI 15 and ALI 21, hypothesis calculations were mainly based on ALI 15 score. ALI 21 is presented for completeness as far as possible. Furthermore, two sub-scores were created, namely "ALI-I" and "ALI-II". The ALI-I represents primary mediators of the stress response and physiological adaptation to the challenge (first defense line including cortisol, noradrenalin, adrenalin, DHEAS, aldosterone, dopamine, IL-6 [not available: TNF- $\alpha$ , IGF-1]). The ALI-II represents secondary mediators, which are involved in the prolonged (mal)adaptation to chronic stress (HbA1c, triglycerides, cholesterol, LDL, HDL, fasting glucose, insulin, CRP, fibrinogen and s-ICAM-1 [not available: WHR, exclusive of BPsyst, BPdia, BMI]) [56]. TNF- $\alpha$  was under the detection limit of the assay (value < detectable threshold 10 ng/ml) and was excluded from further calculations. Psychometric measures were prepared along the lines of manual recommendations. Finally, the data analysis was conducted using the IBM SPSS Statistics program (IBM SPSS 24.0) and R [57, 58].

Besides descriptive statistics, paired sample t-tests ( $t_0 - t_0$ ,  $t_0 - t_2$ ) and multiple regression models ( $t_0 - t_0$  and for DXA  $t_0 - t_4$ ) were applied for the pretest and hypotheses 1. Least Absolute Shrinkage and Selection Operator Model (LASSO) [59] were applied in hypothesis 2 for the selection of the most important allostatic mediators (of 19 potential single mediators,  $n=91$  observations,  $t_0 - t_0$ ). Because first descriptive results and paired sample t-tests indicated no significant changes either in bone biomarkers (OC, CTX, P1NP nor in allostatic load indices ALI-15, ALI-I, ALI-II from therapy start ( $t_0$ ) to follow-up measurement 5 months later ( $t_2$ )), the calculation of hypothesis 1 was performed cross-sectionally with the advantage of a higher complete case set. The same procedure was done for LASSO models (only complete allostatic mediator calculation), although here significant differences between  $t_0 - t_2$  were detected in 6 mediators (DHEA-S, fasting glucose, HbA1c, sICAM-1, adrenalin, sE-selectin see result section). All statistic models were controlled for age, gender and study sites. DXA measurement analysis were also controlled for weight.

## **Results**

### *Descriptive*

$n = 208$  patients completed the initial examination. Of those,  $n = 101$  patients were from the psychosomatic rehabilitation clinic (age:  $M = 48.3$ ,  $SD = 8.9$ ,  $f = 86.1\%$ ,  $BDI: M = 25.7$ ,  $SD = 10.3$ , antidepressants = 66.3%),  $n = 62$  from the outpatient psychiatric practice (age:  $M = 51.6$ ,  $SD = 9.1$ ,  $f = 72.6\%$ ,  $BDI: M = 20.5$ ,  $SD = 8.8$ , antidepressants = 83.9%), and  $n = 45$  from the psychotherapeutic outpatient clinic (age:  $M = 36.0$ ,  $SD = 11.5$ ,  $f = 55.5\%$ ,  $BDI: M = 23.7$ ,  $SD = 10.7$ , antidepressants = 42.2%). 65% of the patients suffered from severe to moderate depression and presented severe psychosomatic symptoms (GSI: 41.8%; PSDI: 42.3%). 29.3% of the sample showed higher allostatic load (values above mediansplit). Descriptive statistics are presented in table 1, 2 and 3.

Mean values of all biomarkers were within the normal range. Significant differences between allostatic load mediators from therapy start ( $t_0$ ) to follow up measurement ( $t_2$ ) were only seen in single biomarkers: in detail DHEAS ( $t(70)=-2.115$ ,  $P=.038$ ), fasting glucose ( $t(63)=-4.266$ ,  $P<.001$ ), HbA1c ( $t(65)=-3.367$ ,  $P=.001$ ), sICAM-1 ( $t(70)=-3.022$ ,  $P=.004$ ) decreased and adrenalin ( $t(58)=2.689$ ,  $P=.009$ ) and sE-selectin ( $t(24)=5.689$ ,  $P<.001$ ) increased over time ( $t_0 - t_2$ ).

A subsample of  $n = 18$  patients (age:  $M = 53.8$ ,  $SD = 6.37$ ,  $f = 77.8\%$ , mean body-mass index  $25.6$   $kg/m^2$  ( $SD = 4.7$   $kg/m^2$ )) was available for DXA bone densitometry measurements. Bone mineral density (BMD) in the trochanter region of the proximal femur was  $M = 0.942$   $g/cm^2$  ( $SD = 0.19$   $g/cm^2$ ). In two patients, asymmetry (defined as a  $t$ -value difference  $> 0.2$ ) was detected. For one female, the measurement was performed unilaterally (left) because of an implanted total hip replacement (THR) in the right femur. Mean  $t$ -value was  $0.56$  ( $SD = 1.35$ ). 16 subjects had normal scores regarding BMD. Minimal  $t$ -value was  $-1.3$ ; maximum  $t$ -value was  $3.3$ . Mean  $z$ -value was  $94.6\%$  ( $SD = 15.4\%$ ). Osteoporosis ( $t$ -value  $< -2.5$ ) was not detected, osteopenia ( $t$ -value between  $< -1.0$  and  $-2.5$ ) was seen in two females.

Mean BMD in the lumbar spine (mean of lumbar vertebral bodies L1-L4) was  $1.144$   $g/cm^2$  ( $SD = 0.22$   $g/cm^2$ ). Mean  $t$ -value was  $-0.38$  ( $SD = 1.75$ ). Thirteen subjects had normal scores regarding mean BMD in the lumbar spine. Minimal  $t$ -value was  $-4.1$ ; maximum  $t$ -value was  $2.1$ . Mean  $z$ -value was  $100.2\%$  ( $SD = 14.0\%$ ). Osteoporosis (defined as a  $t$ -value  $< -2.5$ ) was detected in three females, osteopenia ( $t$ -value between  $< -1.0$  and  $-2.5$ ) was seen in two females. In case of discordance of the  $t$ -value between the trochanter region of the proximal femora and the lumbar spine, the diagnosis of the spine was assumed as overall diagnosis, because of its larger bone volume.

**Table 1.** Descriptive clinical characteristics ( $M$ ,  $SD$ ) at baseline ( $t_0$ , therapy start)

| Clinical characteristic                       | $M$    | $SD$  | $N$    | %     | NA | $n.ob$ |
|-----------------------------------------------|--------|-------|--------|-------|----|--------|
| Gender (female)                               |        |       | 157.00 | 75.48 | 0  | 208    |
| Study site                                    |        |       |        |       |    |        |
| • psychosomatic rehabilitation clinic         |        |       | 101.00 | 48.56 | 0  | 101    |
| • psychotherapeutic outpatient clinic         |        |       | 45.00  | 21.63 | 0  | 45     |
| • outpatient psychiatric practice             |        |       | 62.00  | 29.81 | 0  | 62     |
| Regular cigarette use (yes)                   |        |       | 47.00  | 22.71 | 1  | 207    |
| Regular alcohol use (yes)                     |        |       | 36.00  | 17.56 | 3  | 205    |
| Antidepressiva (yes)                          |        |       | 138.00 | 93.24 | 60 | 148    |
| BDI-II <sup>a</sup> severity                  |        |       |        |       | 15 | 193    |
| none                                          |        |       | 11.00  | 5.67  |    |        |
| minimal                                       |        |       | 23.00  | 11.92 |    |        |
| mild                                          |        |       | 33.00  | 17.10 |    |        |
| moderate                                      |        |       | 66.00  | 34.20 |    |        |
| severe                                        |        |       | 60.00  | 31.09 |    |        |
| Age (years)                                   | 46.63  | 11.13 |        |       | 0  | 208    |
| Weight (kg)                                   | 78.88  | 17.97 |        |       | 47 | 161    |
| Height (cm)                                   | 169.31 | 8.33  |        |       | 48 | 160    |
| Body Mass Index (weight/height <sup>2</sup> ) | 27.46  | 5.80  |        |       | 48 | 160    |
| BDI-II sum score                              | 23.61  | 10.14 |        |       | 15 | 193    |
| LE all <sup>b</sup>                           | 13.91  | 9.96  |        |       | 43 | 165    |
| SCL-90 <sup>c</sup> PSDI <sup>c</sup>         | 2.05   | 0.53  |        |       | 33 | 175    |
| SCL-90 PST <sup>d</sup>                       | 42.49  | 19.85 |        |       | 16 | 192    |
| SCL-90 GSI <sup>e</sup>                       | 1.11   | 0.55  |        |       | 34 | 174    |

<sup>a</sup> Beck Depression Inventory, <sup>b</sup> life events total score (LE all), Inventory of critical life events (ILE), <sup>c</sup> Symptom Check List 90 – revised (SCL-90-R) Positive Symptom Distress Index (PSDI), <sup>d</sup> SCL-90-R Positive Symptom total (PST), <sup>e</sup> SCL-90-R Global severity index (GSI)

**Table 2.** Descriptive statistics (*M*, *SD*) of biomarkers at baseline (*t*<sub>0</sub>, therapy start)

| at baseline ( <i>t</i> <sub>0</sub> , therapy start) |            |          |            |           |           |          |
|------------------------------------------------------|------------|----------|------------|-----------|-----------|----------|
| Biomarker characteristics                            | <i>min</i> | <i>M</i> | <i>max</i> | <i>SD</i> | <i>NA</i> | <i>n</i> |
| <b>AL-indices</b>                                    |            |          |            |           |           |          |
| ALI 21 <sup>a</sup>                                  | 0.00       | 3.64     | 11.00      | 2.64      | 46        | 162      |
| ALI 15 <sup>a</sup>                                  | 0.00       | 3.42     | 10.00      | 2.41      | 107       | 101      |
| ALI-I <sup>b</sup>                                   | 0.00       | 1.50     | 5.00       | 1.19      | 74        | 134      |
| ALI-II <sup>c</sup>                                  | 0.00       | 2.83     | 10.00      | 2.51      | 56        | 152      |
| <b>Metabolic markers</b>                             |            |          |            |           |           |          |
| HbA1c (IFCC) [mmol/mol]                              | 26.00      | 33.90    | 43.00      | 3.48      | 56        | 152      |
| Insulin [ $\mu$ U/ml]                                | 1.94       | 8.98     | 27.92      | 5.36      | 51        | 157      |
| HDL [mg/dL]                                          | 12.40      | 51.71    | 90.00      | 16.18     | 47        | 161      |
| LDL [mg/dL]                                          | 30.00      | 113.86   | 213.00     | 37.49     | 48        | 160      |
| Cholesterol [mg/dL]                                  | 63.00      | 193.77   | 322.00     | 48.18     | 50        | 158      |
| Triglyceride [mg/dL]                                 | 14.88      | 110.38   | 276.00     | 52.77     | 53        | 155      |
| Glucose (NaF) [mg/dL]                                | 57.00      | 85.56    | 124.00     | 11.28     | 59        | 149      |
| HOMA Index                                           | 0.40       | 2.04     | 8.00       | 1.50      | 59        | 149      |
| BMI [weight/height <sup>2</sup> ]                    | 18.07      | 27.44    | 47.75      | 5.78      | 48        | 160      |
| <b>SNS und HPA markers</b>                           |            |          |            |           |           |          |
| Adrenalin [pg/mL]                                    | 8.00       | 168.38   | 490.60     | 117.44    | 64        | 144      |
| Aldosterone [pg/ml]                                  | 56.10      | 169.45   | 324.20     | 56.69     | 67        | 141      |
| Cortisol [nmol/l]                                    | 28.50      | 390.73   | 807.50     | 144.45    | 51        | 157      |
| DHEAS [ $\mu$ mol/l]                                 | 0.25       | 3.89     | 9.45       | 2.10      | 50        | 158      |
| Dopamine [pg/mL]                                     | 4.00       | 32.62    | 259.50     | 47.47     | 72        | 136      |
| Noradrenalin [pg/mL]                                 | 20.00      | 390.770  | 875.00     | 184.66    | 64        | 144      |
| <b>Immune markers</b>                                |            |          |            |           |           |          |
| CRP [mg/L]                                           | 0.06       | 0.19     | 0.79       | 0.20      | 52        | 156      |
| Fibrinogen [mg/dL]                                   | 146.00     | 309.08   | 501.00     | 69.95     | 54        | 154      |
| IL-6 [pg/ml]                                         | 1.50       | 2.11     | 7.80       | 1.22      | 47        | 161      |
| TNF- $\alpha$ [pg/ml]                                | --         | --       | --         | --        | --        | --       |
| sE-Selectin [ng/ml]                                  | 13.80      | 52.22    | 102.50     | 17.30     | 101       | 107      |
| <b>Cardiovascular markers</b>                        |            |          |            |           |           |          |
| Blood pressure systolic [mmHg]                       | 99.00      | 127.50   | 180.00     | 17.65     | 164       | 44       |
| Blood pressure diastolic [mmHg]                      | 60.00      | 85.07    | 111.00     | 10.34     | 164       | 44       |
| Heart rate [beat per minute]                         | 56.00      | 78.42    | 104.00     | 11.95     | 165       | 43       |
| <b>Bone marker</b>                                   |            |          |            |           |           |          |
| CTX [ng/ml]                                          | 0.06       | 0.32     | 0.62       | 0.12      | 67        | 141      |
| Osteocalcin [ng/ml]                                  | 6.70       | 16.65    | 31.30      | 5.31      | 65        | 143      |
| P1NP [ $\mu$ g/l]                                    | 14.90      | 47.75    | 94.80      | 17.02     | 65        | 143      |

<sup>a</sup>allostatic load index with 15 indicators (cortisol, adrenalin, noradrenalin, DHEAS, IL-6, CRP, fibrinogen, sE-selectin, sICAM-1, Hba1c, fasting glucose, HOMA, triglycerides, HDL, LDL) and for ALI 21 further: aldosterone, dopamine, BMI, RR, HRV

<sup>b</sup>ALI primary indicators (cortisol, noradrenalin, adrenalin, DHEAS, aldosteron, dopamin, IL-6, [not available: TNF- $\alpha$ , IGF-1]) [56]

<sup>c</sup>ALI secondary indicators (HbA1c, triglycerides, cholesterol, LDL, HDL, fasting glucose, insulin, CRP, fibrinogen, sICAM-1 [not available: exclusive of BPsyst, BPdia, BMI, WHR]) [56]



**Table 3.** Descriptive statistics (*M*, *SD*) of biomarkers at follow up ( $t_2$ :  $t_0 + 5$  month, therapy end) and BMD measures at follow up ( $t_4$ :  $t_0 + 18$  month)

| at 5 month follow up ( $t_2$ therapy end) |        |        |        |        |     |          |
|-------------------------------------------|--------|--------|--------|--------|-----|----------|
| Biomarker characteristics                 | min    | M      | max    | SD     | NA  | <i>n</i> |
| <b>AL-indices</b>                         |        |        |        |        |     |          |
| ALI 15 <sup>a</sup>                       | 0.00   | 3.50   | 8.00   | 1.84   | 170 | 38       |
| ALI-I <sup>b</sup>                        | 0.00   | 1.52   | 5.00   | 1.13   | 131 | 77       |
| ALI-II <sup>c</sup>                       | 0.00   | 2.37   | 8.00   | 2.13   | 129 | 79       |
| <b>Metabolic markers</b>                  |        |        |        |        |     |          |
| HbA1c (IFCC) [mmol/mol]                   | 26.00  | 35.44  | 49.00  | 4.79   | 130 | 78       |
| Insulin [ $\mu$ U/ml]                     | 2.09   | 9.48   | 31.40  | 5.84   | 132 | 76       |
| HDL [mg/dL]                               | 19.30  | 53.61  | 95.00  | 16.72  | 127 | 81       |
| LDL [mg/dL]                               | 35.00  | 120.49 | 227.00 | 39.30  | 127 | 81       |
| Cholesterol [mg/dL]                       | 75.00  | 197.70 | 315.00 | 49.50  | 128 | 80       |
| Triglyceride [mg/dL]                      | 25.00  | 121.71 | 286.13 | 66.41  | 129 | 79       |
| Glucose (NaF) [mg/dL]                     | 69.00  | 92.68  | 141.00 | 14.91  | 130 | 78       |
| HOMA Index                                | 0.40   | 2.13   | 6.80   | 1.41   | 134 | 74       |
| <b>SNS und HPA markers</b>                |        |        |        |        |     |          |
| Adrenalin [pg/mL]                         | 27.50  | 137.33 | 352.00 | 73.70  | 131 | 77       |
| Aldosterone [pg/ml]                       | 37.70  | 145.88 | 268.80 | 53.99  | 135 | 73       |
| Cortisol [nmol/l]                         | 52.90  | 339.71 | 609.80 | 116.72 | 129 | 79       |
| DHEAS [ $\mu$ mol/l]                      | 0.83   | 3.98   | 9.56   | 2.27   | 128 | 80       |
| Dopamine [pg/mL]                          | 4.00   | 22.068 | 259.50 | 19.53  | 135 | 73       |
| Noradrenalin [pg/mL]                      | 20.00  | 410.65 | 927.90 | 180.54 | 136 | 72       |
| <b>Immune markers</b>                     |        |        |        |        |     |          |
| CRP [mg/L]                                | 0.06   | 0.18   | 0.78   | 0.18   | 133 | 751      |
| Fibrinogen [mg/dL]                        | 186.00 | 298.04 | 186.00 | 71.06  | 127 | 81       |
| IL-6 [pg/ml]                              | 1.50   | 2.02   | 5.20   | 0.93   | 130 | 78       |
| TNF- $\alpha$ [pg/ml]                     | --     | --     | --     | --     | --  | --       |
| sE-Selectin [ng/ml]                       | 12.50  | 51.77  | 86.50  | 17.81  | 171 | 37       |
| <b>Bone marker</b>                        |        |        |        |        |     |          |
| CTX [ng/ml]                               | 0.10   | 0.31   | 0.59   | 0.11   | 132 | 76       |
| Osteocalcin [ng/ml]                       | 7.60   | 16.62  | 29.50  | 5.07   | 133 | 75       |
| P1NP [ $\mu$ g/l]                         | 15.00  | 47.08  | 92.20  | 17.64  | 131 | 77       |
| at 18 month follow up ( $t_4$ )           |        |        |        |        |     |          |
| <b>Bone density</b>                       |        |        |        |        |     |          |
| BMD_GMW <sup>d</sup>                      | 0.62   | 0.92   | 1.09   | 0.15   | 39  | 16       |
| BMD_HMW <sup>d</sup>                      | 0.66   | 0.86   | 1.04   | 0.12   | 39  | 16       |
| BMD_L1L4 <sup>d</sup>                     | 0.69   | 1.12   | 1.43   | 0.21   | 39  | 16       |
| BMD_SMW <sup>d</sup>                      | 0.72   | 1.08   | 1.37   | 0.17   | 40  | 15       |
| BMD_TMW <sup>d</sup>                      | 0.43   | 0.74   | 0.93   | 0.15   | 39  | 16       |
| sICAM-1 [ng/ml]                           | 151.90 | 355.58 | 616.30 | 84.65  | 49  | 159      |

<sup>a</sup> allostatic load index with 15 indicators (cortisol, adrenalin, noradrenalin, DHEAS, IL-6, CRP, fibrinogen, sE-selectin, sICAM-1, Hba1c, fasting glucose, HOMA, triglycerides, HDL, LDL) and for ALI 21 further: aldosterone, dopamine, BMI, RR, HRV

<sup>b</sup> ALI primary indicators (cortisol, noradrenalin, adrenalin, DHEAS, aldosteron, dopamin, IL-6, [not available: TNF- $\alpha$ , IGF-1]) [56]

<sup>c</sup> ALI secondary indicators (HbA1c, triglycerides, cholesterol, LDL, HDL, fasting glucose, insulin, CRP, fibrinogen, sICAM-1 [not available: exclusive of BPsys, BPdia, BMI, WHR]) [56]

<sup>d</sup> Mean value of different bone mineral density measurements

## First study part / Work Package

## Bone metabolism related to depressive symptomatology level and psychosomatic symptom severity

Multiple linear regression models indicate that the magnitude of the depressiveness (OC:  $b = .083$  [95%CI  $-.008, .173$ ],  $P = .075$ ) and symptom severity (PSDI: P1NP:  $b = 5.304$  [95%CI  $-.585, 11.194$ ],  $P = .081$ ; OC:  $b = .91$  [95%CI  $.855, 4.407$ ],  $P = .005$ ; CTX:  $b = .052$  [95%CI  $.011, .093$ ],  $P = .016$ ); GSI: OC:  $b = 2.096$  [95%CI  $.447, 3.745$ ],  $P = .015$ ) influence the extend of the anabolic bone marker expression, whereby higher severity coincides with higher bone marker expression (details see table 4).

## Life burden and bone metabolism

A regression model confirms that life burden is associated with depressiveness (BDI-II:  $b = .237$  [95%CI  $.064, .411$ ],  $P = .008$ ). Furthermore, people with high life burden show significantly less anabolic bone marker expression in an acute depression episode as the other depressed patients in this sample (see table 4).

**Table 4.** Main effects (regression coefficient  $b$ ) of depressiveness, life events, psychosomatic symptoms severity, and AL-indices on bone marker at baseline ( $t_0$ )

|                               | P1NP         |                |       | OC            |                |       | CTX           |                |       |
|-------------------------------|--------------|----------------|-------|---------------|----------------|-------|---------------|----------------|-------|
|                               | coefficient  | CI             | $p$   | coefficient   | CI             | $p$   | coefficient   | CI             | $p$   |
| BDI-II sum score <sup>a</sup> | 0.121        | -0.170, 0.413  | 0.417 | <b>0.083</b>  | -0.008, 0.173  | 0.075 | 0.0004        | -0.002, 0.002  | 0.727 |
| SCL-90 PSDI <sup>b</sup>      | <b>5.304</b> | -0.585, 11.194 | 0.081 | <b>2.631</b>  | 0.855, 4.407   | 0.005 | <b>0.052</b>  | 0.011, 0.093   | 0.016 |
| SCL-90 PST <sup>c</sup>       | 0.061        | -0.134, 0.256  | 0.543 | 0.045         | -0.015, 0.105  | 0.145 | -0.0002       | -0.002, 0.001  | 0.729 |
| SCL90 GSI <sup>d</sup>        | 3.222        | -2.103, 8.548  | 0.239 | <b>2.096</b>  | 0.447, 3.745   | 0.015 | 0.020         | -0.020, 0.059  | 0.333 |
| LE all <sup>e</sup>           | 0.158        | -0.153, 0.470  | 0.317 | <b>0.111</b>  | 0.017, 0.206   | 0.021 | <b>0.002</b>  | 0.000, 0.004   | 0.049 |
| ALI 21                        | -0.523       | -1.650, 0.604  | 0.365 | <b>-0.438</b> | -0.779, -0.096 | 0.014 | <b>-0.009</b> | -0.017, -0.001 | 0.025 |
| ALI 15                        | -0.435       | -1.759, 0.888  | 0.521 | <b>-0.462</b> | -0.864, -0.059 | 0.027 | <b>-0.009</b> | -0.018, 0.0005 | 0.065 |
| ALI-II                        | -0.351       | -1.585, 0.884  | 0.579 | <b>-0.492</b> | -0.875, -0.108 | 0.014 | <b>-0.008</b> | -0.017, 0.001  | 0.088 |
| ALI-I                         | 0.734        | -1.824, 3.291  | 0.576 | 0.467         | -0.318, 1.253  | 0.246 | -0.005        | -0.023, 0.014  | 0.614 |

Multiple interaction regression models, adjusted for age, gender, study sides. Significant Regression coefficients are bold ( $p < .01$ ,  $p < .05$ ,  $p < .10$  two sided testing)

<sup>a</sup> Beck Depression Inventory; sum score, <sup>b</sup> Symptom Check List - revised SCL-90-R, Positive symptom distress index, <sup>c</sup> Symptom Check List - revised SCL-90-R, Positive symptom total, <sup>d</sup> Symptom Check List - revised SCL-90-R, Global severity index, <sup>e</sup> Inventory of critical life events (ILE), count of all life events

### Allostatic load association with depression

There were no significant associations between allostatic load (ALI 15) and depression (BDI-II:  $b = -.186$  [95%CI  $-.937, .565$ ],  $P = .625$ ) as well as between allostatic load (ALI 15) and life burden (LE all:  $b = -.611$  [95%CI  $-1.397, .175$ ],  $P = .127$ ) detected.

### Second study part / Work-Package

#### Metabolic bone adaption abilities of depressive people with high allostatic load and bone microstructure alterations

People with high ALI show a decreased bone metabolism and an overall catabolic shift (counter regulation of the anabolic expression (ALI-15: OC:  $b = -.462$  [95%CI  $-.864, -.059$ ],  $P = .027$ ; CTX:  $b = -.009$  [95%CI  $-.018, .001$ ],  $P = .065$ ); ALI-II: OC:  $b = -1.107$  [95%CI  $-1.772, -.441$ ],  $P = .002$ ) during a depression episode (see table 4).

Furthermore, descriptive analysis confirmed reduced bone mineral density for subjects with high ALI. Similarly, multiple regression models (controlled for age, gender weight) indicate that high allostatic load is associated with lower BMD in different areas (BMD\_GMW  $b = -.028$  [95%CI  $-0.070, 0.013$ ],  $P = 0.220$ ; BMD\_HMW  $b = -.011$  [95%CI  $-0.053, 0.030$ ],  $P = .605$ ; BMD\_SMW  $b = -.038$  [95%CI  $-0.087, 0.010$ ],  $P = .161$ ; BMD\_TMW  $b = -.032$  [95%CI  $-0.071, 0.007$ ]  $P = .148$ ; BMD\_L1L4  $b = -.029$  [95%CI  $-0.077, 0.019$ ],  $P = .027$ ) (see also figure 1).

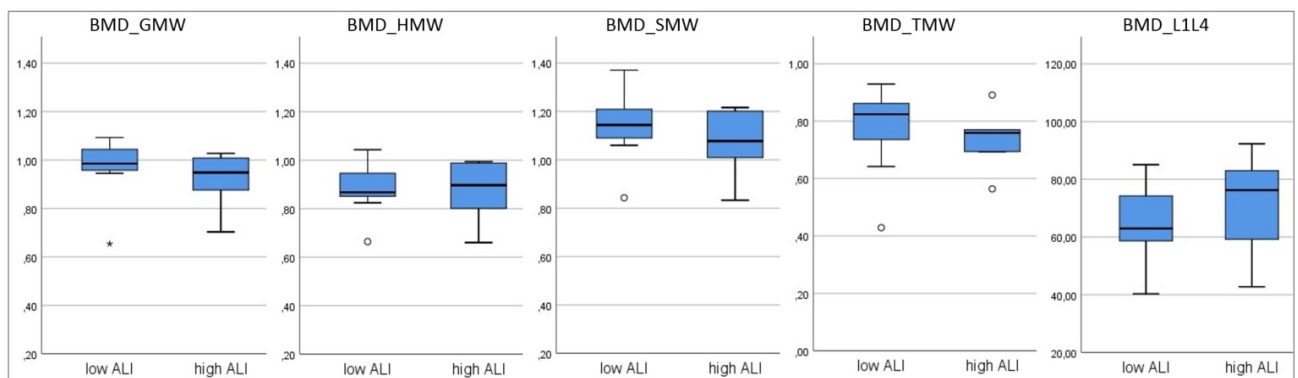

**Fig. 1.** Bloxplots showing bone mineral density measurements for Mean value of all bone mineral density measurements (GMW, HMW, SMW, TMW) and lumbar vertebral bodies L1-L4 (in this graph not controlled for gender, age, weight) stratified for low and high allostatic load (AL-Index)

#### Selection of predictors for diagnosis and personalized treatment (Hypothesis 2)

The LASSO Model with  $n=91$  observations revealed that none of 19 potential single allostatic mediators or mediator sets could be selected for a prediction of (altered levels of) osteocalcin, CTX or P1NP in depressive subjects. A diagnosis failed on the base of blood biomarkers in this study and did not suggest further analysis such as root mean square errors or ROC analysis.

## Discussion

Combining longitudinal design and baseline conditions with an appropriate patient selection is crucial for gaining insights into (physiological) adaptations during a depressive episode. Around 1/3 of the patients in this study suffered from severe depression and psychosomatic symptoms, around 1/3 showed a high allostatic load (not excessively, nobody reached the scale maximum) and each patient had, on average, experienced 14 life changing events. Life burden, operationalized by the mentioned life events, was positively associated with the development of depression as described in the literature [36, 60, 61]. In our cohort, we do not have a broader spectrum of comorbid patients confirmed by non-significant associations between life burden and allostatic load as well as allostatic load and depression severity. Most of the patients suffered from an acute (and mostly a first or second) depression episode (ICD-10 F32.x or F33.x).

This enables us to determine whether people during an acute depressive episode show alterations in bone metabolism and whether this depends on depression and psychosomatic symptom severity. On the one hand, we observed that higher depression and symptom severity were associated with a higher expression of anabolic bone metabolism in bone formation (OC; P1NP) and bone turnover marker (CTx). On the other hand, we observed that people suffering from higher life burden showed significantly less anabolic expression (OC and CTx) during the acute depression episode. These findings describing a metabolic adaptation in bones during a depression episode are novel, highly valuable and clinically significant.

Furthermore, it was of interest whether patients suffering from high allostatic load burden are at higher risk for bone diseases through altered bone metabolism in short term and altered bone mineralization in long-term. Patients with high allostatic load showed a significantly decreased bone metabolism, indicated by an overall catabolic shift of bone formation markers (P1NP, OC) and a relative stagnancy /decreased bone turnover (CTx) in the short-term. People with allostatic load didn't show a "normal" allostatic response related to the stressful depression episode, maybe due to a previous accumulation of toxic stress in tissues and cells [62]. The disrupted bone metabolism of patients with ALI was also reflected by reduced bone mineral density in the lumbar spine and both hips (DXA) after 18 months. Although these results were only descriptively evaluated due to the small group size, they are nonetheless consistent with the highlighted serum marker changes, thus confirming the relevance of the data. Knowing about the vicious circle of intercorrelations between bone disorders (*e.g.* osteoporosis, insufficient fractures, arthrosis), pain syndromes and their reinforcement of the depressive symptomatology, the results seem of high significance for the medical care of depressed patients.

In the organization of an appropriate medical care, diagnostic tools are essential. For this purpose, a mathematical selection algorithm was applied to detect an explanatory set that would provide information about risk profiles and adequate treatment preventing comorbidities for bone diseases. Using the LASSO technique, we were not able to identify a single allostatic mediator or mediator set that would be reliable enough to serve as an easy diagnostic tool for depressive patients at higher risk for metabolic bone alterations. Furthermore, and in contrast to other (rare) studies [26, 27], no moderator for an interaction between the "osteoblast suppressor", cortisol, as well as the pro-inflammatory cytokine, IL-6, and the bone markers, osteocalcin, P1NP and CTx was detected. One possible reason could be that the LASSO technique simultaneously penalized or

unpenalized all influencing factors within one model, thus reducing intercorrelations and confounders. Only very strong and unambiguous influencing factors remain. This is in line with the idea that complex neuroendocrinologic and neuroanatomic alterations of biography should be assessed by multidimensional indices and not by single mediators which can be affected by daily changes, assessment techniques or be an effect of another alteration. Several studies show that consequences of biographical and chronic stress are based on early multifactorial alterations of mitochondrial biology that influence different functional and molecular indicators (for mitochondrial allostatic load, MAL see [63-65], for catabolic neuronal factor patterns NGF, NPYR1, VIPR1 and TACR [66]).

*Summary:* Our findings suggest that an acute depressive episode leads to an anabolic activation of bone metabolism, with the level of activation increasing with higher severity of the depression and psychosomatic symptoms. However, this metabolic adaptation to an exceptionally high stress episode is restricted in patients with a higher life burden and completely absent in patients with allostatic overload. The latter group shows a catabolic and bone-damaging response that is reflected in reduced bone mineral density in the long term. The development of diagnostic tools seems important, yet was not possible in this cohort. Nevertheless, the results of this study may be of high importance for the understanding of the mechanism of bone development and treatment of depressive patients in clinical routines [67].

*Limitations:* The empirical results reported herein must be considered in the light of some limitations that should be addressed in future research. Firstly, the report focused only on the explanation of physiological associations and ignored interactions between bone markers and psychometric biographical measures. Secondly, due to the nature of an observational multicenter study that comprises participants from three different study sites and is reliant on voluntary participation of patients, potential selection bias or effect of preexisting differences between study sites cannot be ruled out. However, as we controlled for confounding variables (*e.g.* study site, sociodemographic variable) in all analysis, the impact of these biases should be limited. Thirdly, although the baseline sample size was sufficient, missing data and subsample analysis had a potential impact on the statistical power and margin of error to identify effects. There was only a small subsample available for bone mineral density (BMD) measurements at an additional fourth follow-up. Therefore, moderator analyses must be dispensed, and the generalization of the results is strongly limited. Furthermore, LASSO models were calculated cross-sectionally, although prediction analyses are usually performed in longitudinal format. However, since there are little to no differences between the biomarkers and the follow up measurement, a cross-sectional calculation was chosen in favor of a higher N. And lastly, clinical implications would be based on a diagnostic tool; a derivation of such a tool was not possible till now. Further analyses with a combination of psychometric and biological data might help to be successful in this task.

## References (Numerical)

- 1 Eapen E, Grey V, Don-Wauchope A, Atkinson SA: Bone health in childhood: usefulness of biochemical biomarkers. *eJIFCC* 2008;19:123-136.
- 2 Iglesias L, Yeh JK, Castro-Magana M, Aloia JF: Effects of growth hormone on bone modeling and remodeling in hypophysectomized young female rats: a bone histomorphometric study. *Journal of Bone and Mineral Metabolism* 2011;29:159-167.
- 3 Seguro LPC, Casella CB, Caparbo VF, Oliveira RM, Bonfa A, Bonfa E, Pereira RMR: Lower P1NP serum levels: a predictive marker of bone loss after 1 year follow-up in premenopausal systemic lupus erythematosus patients. *Osteoporosis International* 2015;26:459-467.
- 4 Wippert P-M, Rector M, Kuhn GA, Würtz K: Stress and Alterations in Bones: An Interdisciplinary Perspective. *Frontiers Endocrinology* 2017;8
- 5 McEwen BS, Stellar E: Stress and the individual. Mechanisms leading to disease. *Archives of Internal Medicine* 1993;153:2093-2101.
- 6 Engel GL: The need for a new medical model: a challenge for biomedicine. *Science* 1977;196:129-136.
- 7 Kiecolt-Glaser JK, McGuire L, Robles TF, Glaser R: Psychoneuroimmunology and psychosomatic medicine: back to the future. *Psychosomatic Medicine* 2002;64:15-28.
- 8 McEwen BS: Stress, adaptation, and disease: Allostasis and allostatic load. *Annals of the New York Academy of Sciences* 2006;840:33-44.
- 9 McEwen BS: Allostasis and the epigenetics of brain and body health over the life course: the brain on stress. *JAMA psychiatry* 2017;74:551-552.
- 10 McEwen BS, Nasveld P, Palmer M, Anderson R: Allostatic Load: A Review of the Literature: P02297. Canberra, Department of Veterans' Affairs, 2012, pp 1-115.
- 11 Juster RP, McEwen BS, Lupien SJ: Allostatic load biomarkers of chronic stress and impact on health and cognition. *Neuroscience & Biobehavioral Reviews* 2010;35:2-16.
- 12 Seeman TE, Singer BH, Rowe JW: Price of Adaptation—Allostatic Load and Its Health Consequences. *MacArthur Studies of Successful Aging. JAMA Internal Medicine* 1997;157:2259-2268.
- 13 McEwen BS, Nasca C, Gray JD: Stress Effects on Neuronal Structure: Hippocampus, Amygdala, and Prefrontal Cortex. *Neuropsychopharmacology* 2016;41:3 - 23.
- 14 Birnbaum RS, Bowsher RR, Wiren KM: Changes in IGF-I and -II expression and secretion during the proliferation and differentiation of normal rat osteoblasts. *J Endocrinol* 1995;144:251-259.
- 15 Rydziel S, Delany AM, Canalis E: Insulin-like growth factor I inhibits the transcription of collagenase 3 in osteoblast cultures. *J Cell Biochem* 1997;67:176-183.
- 16 Zhao G, Monier-Faugere MC, Langub MC, Geng Z, Nakayama T, Pike JW, Chernausk SD, Rosen CJ, Donahue LR, Malluche HH, Fagin JA, Clemens TL: Targeted overexpression of insulin-like growth factor I to osteoblasts of transgenic mice: increased trabecular bone volume without increased osteoblast proliferation. *Endocrinology* 2000;141:2674-2682.
- 17 Zhang M, Xuan S, Bouxsein ML, von Stechow D, Akeno N, Faugere MC, Malluche H, Zhao G, Rosen CJ, Efstratiadis A, Clemens TL: Osteoblast-specific knockout of the insulin-like growth factor (IGF) receptor gene reveals an essential role of IGF signaling in bone matrix mineralization. *J Biol Chem* 2002;277:44005-44012.
- 18 Olney RC: Regulation of bone mass by growth hormone. *Med Pediatr Oncol* 2003;41:228-234.
- 19 Stracke H, Schulz A, Moeller D, Rossol S, Schatz H: Effect of growth hormone on osteoblasts and demonstration of somatomedin-C/IGF I in bone organ culture. *Acta Endocrinol (Copenh)* 1984;107:16-24.
- 20 Kassem M, Blum W, Ristelli J, Mosekilde L, Eriksen EF: Growth hormone stimulates proliferation and differentiation of normal human osteoblast-like cells in vitro. *Calcif Tissue Int* 1993;52:222-226.
- 21 Nilsson A, Swolin D, Enerback S, Ohlsson C: Expression of functional growth hormone receptors in cultured human osteoblast-like cells. *J Clin Endocrinol Metab* 1995;80:3483-3488.
- 22 Cain DW, Cidlowski JA: Specificity and sensitivity of glucocorticoid signaling in health and disease. *Best Practice & Research Clinical Endocrinology & Metabolism* 2015;29:545-556.
- 23 Silverman MN, EM. S: Glucocorticoid regulation of inflammation and its behavioral and metabolic correlates: from HPA axis to glucocorticoid receptor dysfunction. *Ann N Y Acad Sci* 2012:55-63.
- 24 Chrousos GP: The hypothalamic-pituitary-adrenal axis and immune-mediated inflammation. *N Engl J Med* 1995;332:1351-1362.

- 25 Theoharides TC, Spanos C, Pang X, Alferes L, Ligris K, Letourneau R, Rozniecki JJ, Webster E, Chrousos GP: Stress-induced intracranial mast cell degranulation: a corticotropin-releasing hormone-mediated effect. *Endocrinology* 1995;136:5745-5750.
- 26 Chrousos GP: The stress response and immune function: clinical implications. The 1999 Novera H. Spector Lecture. *Ann N Y Acad Sci* 2000;917:38-67.
- 27 Lacey DC, Simmons PJ, Graves SE, Hamilton JA: Proinflammatory cytokines inhibit osteogenic differentiation from stem cells: implications for bone repair during inflammation. *Osteoarthritis Cartilage* 2009;17:735-742.
- 28 Croes M, Oner FC, Kruyt MC, Blokhuis TJ, Bastian O, Dhert WJ, Alblas J: Proinflammatory Mediators Enhance the Osteogenesis of Human Mesenchymal Stem Cells after Lineage Commitment. *PLoS One* 2015;10:e0132781.
- 29 Holmes SJ, Economou G, Whitehouse RW, Adams JE, Shalet SM: Reduced bone mineral density in patients with adult onset growth hormone deficiency. *J Clin Endocrinol Metab* 1994;78:669-674.
- 30 Degerblad M, Bengtsson BA, Brammert M, Johnell O, Manhem P, Rosen T, Thoren M: Reduced bone mineral density in adults with growth hormone (GH) deficiency: increased bone turnover during 12 months of GH substitution therapy. *Eur J Endocrinol* 1995;133:180-188.
- 31 Hapke U, Maske U, Scheidt-Nave C, Bode L, Schlack R, Busch M: Chronischer Stress bei Erwachsenen in Deutschland. *Bundesgesundheitsblatt - Gesundheitsforschung - Gesundheitsschutz* 2013;56:749-754.
- 32 Penninx BW, Milaneschi Y, Lamers F, Vogelzangs N: Understanding the somatic consequences of depression: biological mechanisms and the role of depression symptom profile. *BMC medicine* 2013;11:129.
- 33 Seplaki CL, Goldman N, Weinstein M, Lin YH: Measurement of cumulative physiological dysregulation in an older population. *Demography* 2006;43:165-183.
- 34 Gold PW: The organization of the stress system and its dysregulation in depressive illness. *Molecular Psychiatry* 2015;20:32-47.
- 35 Gold PW, Machado-Vieira R, Pavlatou MG: Clinical and biochemical manifestations of depression: relation to the neurobiology of stress. *Neural plasticity* 2015;2015
- 36 Saveanu RV, Nemeroff CB: Etiology of Depression: Genetic and Environmental Factors. *Psychiatric Clinics of North America* 2012;35:51-71.
- 37 Holsboer F: Stress, hypercortisolism and corticosteroid receptors in depression: implications for therapy. *Journal of Affective Disorders* 2001;62:77-91.
- 38 Miller GW, Jones DP: The nature of nurture: refining the definition of the exposome. *Toxicological Sciences* 2014;137:1-2.
- 39 Dorn LD, Susman EJ, Pabst S, Huang B, Kalkwarf H, Grimes S: Association of depressive symptoms and anxiety with bone mass and density in ever-smoking and never-smoking adolescent girls. *Arch Pediatr Adolesc Med* 2008;162:1181-1188.
- 40 Yirmiya R, Bab I: Major Depression Is a Risk Factor for Low Bone Mineral Density: A Meta-Analysis. *Biological Psychiatry* 2009;66:423-432.
- 41 G. C: Major depressive disorder is a risk factor for low bone mass, central obesity, and other medical conditions. *Dialogues Clin Neurosci* 2011 13:73-87.
- 42 Calarge CA, Butcher BD, Burns TL, Coryell WH, Schlechte JA, Zemel BS: Major depressive disorder and bone mass in adolescents and young adults. *J Bone Miner Res* 2014;29:2230-2237.
- 43 Bauer ME: Stress, glucocorticoids and ageing of the immune system. *Stress* 2005;8:69 - 83.
- 44 Schweiger JU, Schweiger U, Hüppe M, Kahl KG, Greggersen W, Fassbinder E: Bone density and depressive disorder: a meta-analysis. *Brain and Behavior* 2016
- 45 Rosenblat JD, Gregory JM, Carvalho AF, McIntyre RS: Depression and Disturbed Bone Metabolism: A Narrative Review of the Epidemiological Findings and Postulated Mechanisms *Current Molecular Medicine* 2016;16:165-178.
- 46 Lu K, Luo Y, Chen PY: Sample size estimation for repeated measures analysis in randomized clinical trials with missing data. *International Journal of Biostatistics* 2008;4:1557-4679.
- 47 Beck AT, Steer RA, Brown GK: Manual for the Beck Depression Inventory-II; in Corporation TP (ed). San Antonio, 1996,
- 48 Kuehner C, Burger C, Keller F, Hautzinger M: Reliability and validity of the Revised Beck Depression Inventory (BDI-II). Results from German samples. *Nervenarzt* 2007;78:651-656.
- 49 Herzberg PY, Goldschmidt S, Heinrichs N: Beck Depressions-Inventar (BDI-II). Revision. *Rep Psychologie* 2008;33:301-302.

- 50 Franke GH: SCL-90-R - Die Symptom-Checkliste von L. R. Derogatis (2 ed.). Göttingen, Beltz Test, 2002.
- 51 Derogatis L, Melisaratos N: The Brief Symptom Inventory: An introductory report. *Psychological Medicine* 1983;13:595-605.
- 52 Siegrist J, Geyer S: ILE–Inventar zur Erfassung lebensverändernder Ereignisse; in Hogrefe (ed): *Diagnostische Verfahren in der Psychotherapie*. Göttingen 2002, pp 211-213.
- 53 McEwen BS, Rasgon NL: The brain and body on stress allostatic load and mechanisms for depression and dementia. *Depression as a Systemic Illnes* 2018;14:14-36.
- 54 Bioscientia: Laborbericht -33 Insulinresistenz: Laborbericht -33 Insulinresistenz, <https://www.bioscientia.de/de/downloads/?r=g>, 2018,
- 55 Gruenewald TL, Karlamangla AL, Hu P, Stein-Merkin S, Crandall C, Koretz B, Seeman T: History of socioeconomic disadvantage and allostatic load in later life. *Social Science & Medicine* 2012;74:75-83.
- 56 Beckie TM: A systematic review of allostatic load, health, and health disparities. *Biological Research for Nursing* 2012;14:311-346.
- 57 Muche R, Lanzinger S, Rau M: *Medizinische Statistik mit R und Excel*. Berlin: Springer 2011
- 58 Team RC: *R: A language and environment for statistical computing.*: R Foundation for Statistical Computing. Vienna, Austria, URL: <http://www.R-project.org/>. 2014,
- 59 Tibshirani R: Regression Shrinkage and Selection via the Lasso. *Journal of the Royal Statistical Society - Series B (Methodological)* 1996;58:267-288.
- 60 Kobrosly RW, van Wijngaarden E, Seplaki CL, Cory-Slechta DA, Moynihan J: Depressive symptoms are associated with allostatic load among community-dwelling older adults. *Physiology & Behavior* 2014;123:223-230.
- 61 Wippert P-M, Fliesser M, Krause M: Risk and Protective Factors in the Clinical Rehabilitation of Chronic Back Pain. *Journal of Pain Research* 2017;10:1569-1579.
- 62 Fava GA, McEwen BS, Guidi J, Gostoli S, Offidani E, N. S: Clinical characterization of allostatic overload. *Psychoneuroendocrinology* 2019;108:94-101.
- 63 Heim C, Shugart M, Craighead WE, Nemeroff CB: Neurobiological and psychiatric consequences of child abuse and neglect. *Developmental Psychobiology* 2010;52:671-690.
- 64 Shonkoff JP, Boyce W, McEwen BS: Neuroscience, molecular biology, and the childhood roots of health disparities: Building a new framework for health promotion and disease prevention. *Journal of the American Medical Association* 2009;301:2252-2259.
- 65 Picard M, Mc Ewan BS: Psychological Stress and Mitochondria: A Conceptual Framework. *Psychosomatic Medicine* 2018;80:141-153.
- 66 Tomlinson RE, Li Z, Zhang Q, Goh BC, Li Z, Thorek DLJ, Rajbhandari L, Brushart TM, Minichiello L, Zhuo F, Venkatesan A, Clemens TL: NGF-TrkA signaling by sensory nerves coordinates the vascularization and ossification of developing endochondral bone. *Cell Reports* 2016;16:2723-2735.
- 67 Lee SH, Mastronardi CA, Li RW, Paz-Filho G, Dutcher EG, Lewis MD, Vincent AD, Smith PN, Bornstein SR, Licinio J, Wong ML: Short-term antidepressant treatment has long-lasting effects, and reverses stress-induced decreases in bone features in rats. *Translational Psychiatry* 2019;9
- 68 Karatsoreos I, McEwen BS: Depression: What is the Role of Physiological Dysregulation and Circadian Disruption? *Neuro-Psychoanalysis: An Interdisciplinary Journal* 2009;11



## List of Abbreviations

| Abbreviation                     | Description                                                                                                                                                                          |
|----------------------------------|--------------------------------------------------------------------------------------------------------------------------------------------------------------------------------------|
| Allostasis <sup>1</sup>          | Active process of maintaining homeostasis                                                                                                                                            |
| Allostatic load <sup>1</sup>     | Cumulative change ( <i>e.g.</i> , body fat; remodeling of neuronal circuitry)                                                                                                        |
| Allostatic overload <sup>1</sup> | Wear-and-tear, pathophysiology ( <i>e.g.</i> , neuronal damage, cell loss)                                                                                                           |
| ALI-Total                        | cortisol, adrenalin, noradrenalin, DHEAS, IL-6, CRP, fibrinogen, sE-selectin, sICAM-1, Hba1c, fasting glucose, HOMA, triglycerides, HDL, LDL                                         |
| ALI-primary                      | cortisol, noradrenalin, adrenalin, DHEAS, aldosterone, dopamine, IL-6                                                                                                                |
| ALI-secondary                    | HbA1c, triglycerides, cholesterol, LDL, HDL, fasting glucose, insulin, CRP, fibrinogen and s-ICAM-1                                                                                  |
| ANS                              | Autonomic nervous system in which the stress response is driven by the sympathetic-nervous-system (SNS), sympathetic-adrenal-medullary-system (SAM) and the dopamine systems (DOPA)- |
| BMD                              | Bone mineral density                                                                                                                                                                 |
| CTX                              | Cross Laps, bone turnover marker, resorption                                                                                                                                         |
| CRH                              | Corticotropin-releasing hormone                                                                                                                                                      |
| GH                               | Growth Hormons                                                                                                                                                                       |
| GR                               | Glucocorticoid receptors                                                                                                                                                             |
| HPA axis                         | Hypothalamus-pituitary-adrenal axis                                                                                                                                                  |
| HPT axis                         | Hypothalamic–pituitary–thyroid axis                                                                                                                                                  |
| Homeostasis <sup>1</sup>         | Essential parameters of life                                                                                                                                                         |
| IGF-I                            | Insulin-like growth factor-I                                                                                                                                                         |
| IL-6, IL-1                       | Interleukins, cytokines                                                                                                                                                              |
| n                                | number of participants                                                                                                                                                               |
| NF-κB                            | Nuclear factor 'kappa-light-chain-enhancer' of activated B-cells                                                                                                                     |
| Osteocalcin                      | Bone turnover marker, formation                                                                                                                                                      |
| P1PN                             | Procollagen type 1 amino-terminal propeptide, bone turnover marker, formation                                                                                                        |
| <i>p</i> -values                 | Significance level: $p < 0.01$ , $p < 0.05$ or $p < 0.10$                                                                                                                            |
| TNF-α                            | Tumor necrose factor α                                                                                                                                                               |

<sup>1</sup> Definition from McEwen [10, 68]
